# Supplementary material for: The anti-oxidative transcription factor Nuclear factor E2 related factor-2 (Nrf2) counteracts TGF-β1 mediated growth inhibition of pancreatic ductal epithelial cells -Nrf2 as determinant of pro-tumorigenic functions of TGF-β1
Source: Springer Nature journal article supplement (doi:10.1186/s12885-016-2191-7), 2016-02-25

A)

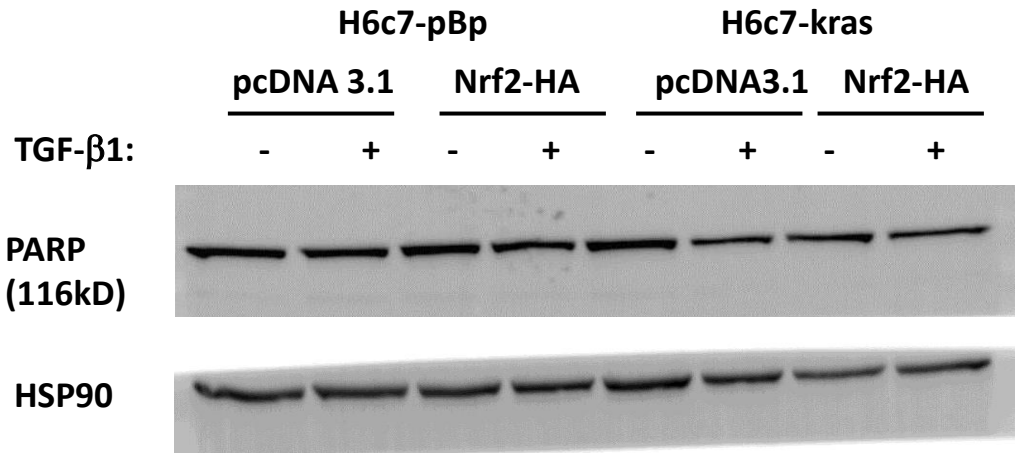

B)

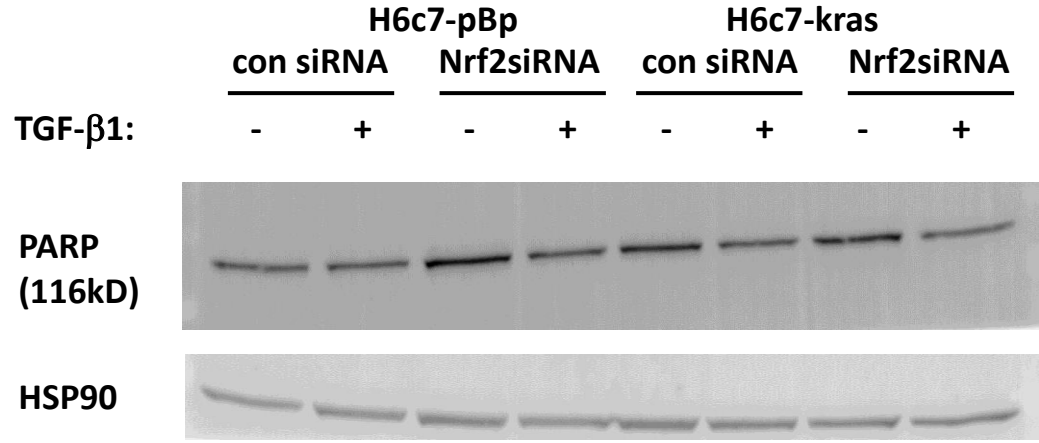

Supplement: MOESM2 [file 9746162]
